# Supplementary material for: Domain-level epitope mapping of polyclonal antibodies against HER-1 and HER-2 receptors using phage display technology
Source: PubMed Central journal article supplement (PMC9293994; doi:10.1038/s41598-022-16411-z), 2022-07-18
Supplement: 41598_2022_16411_MOESM1_ESM.pdf [file 41598_2022_16411_MOESM1_ESM.pdf]

## **Supplemental information**

### **Title:**

**Domain-level epitope mapping of polyclonal antibodies against HER-1 and HER-2 receptors using phage display technology**

### **Authors:**

Dayana Pérez-Martínez, Yanelys Cabrera Infante, Belinda Sánchez Ramírez, Gertrudis Rojas\*

### **Author affiliation:**

Center of Molecular Immunology; calle 216 esq 15, apartado 16040, Atabey, Playa, CP 11300, La Habana, Cuba

\*Correspondence should be addressed to G.R.: [grojas@cim.sld.cu](mailto:grojas@cim.sld.cu)

**a**

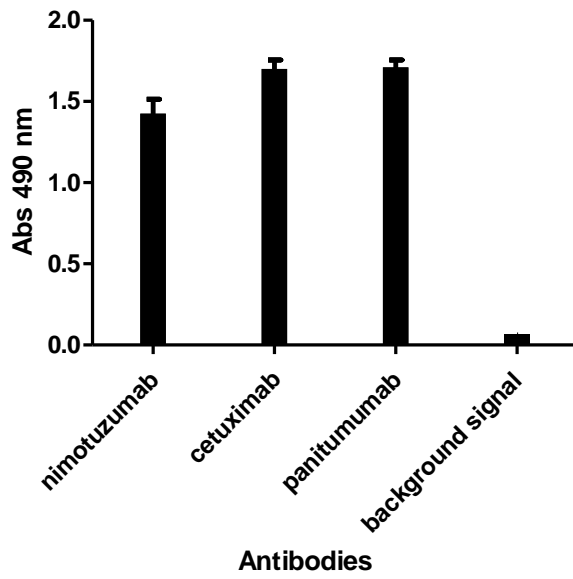

**b**

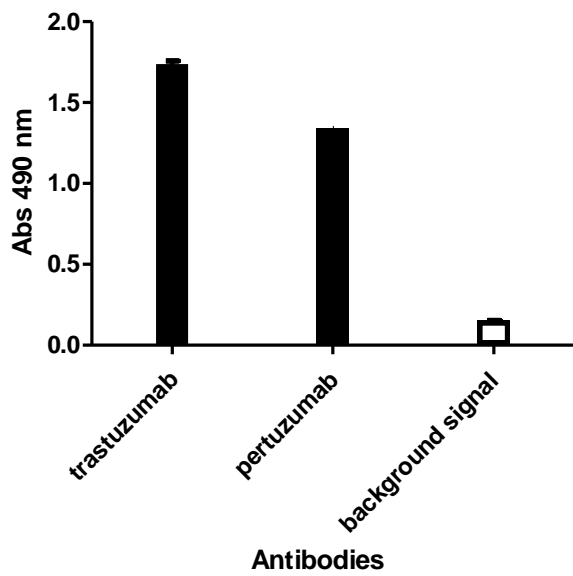

**Supplemental Figure 1. Reactivity of commercial antibodies against HER-1 and HER-2.**

Polyvinyl chloride microtitration plates were coated with either HER-1 (a) or HER-2 (b) recombinant extracellular domains. Monoclonal antibodies (1  $\mu\text{g}/\text{mL}$ ) were incubated on coated plates and detected with an anti-human IgG antibody conjugated to horseradish peroxidase.

List of full DNA and deduced protein sequences of genetic constructs for phage display (from DsbA signal peptide to the end of M13 PVIII)

Color code:

DsbA signal peptide sequence

M13 PVIII sequence

Sequences of HER-1/HER-2 domains

*c-myc* tag sequence

NotI (GCGGCCGC) and SalI (GTCGAC) restriction sites

Changes introduced by site-directed mutagenesis on HER domains are underlined.

- Sequence 1: HER-1domain I

M K K I W L A L A G L V L A F S A S A A E  
ATGAAAAAGATTTGGCTGGCGCTGGCTGGTTTAGTTTTAGCGTTTAGCGCAAGTGCAGCTGAG  
G A A A L E E K K V C Q G T S N K L T Q L  
GGTGGGCGCCCTGGAGGAAAAGAAAGTTTGCCAAGGCACGAGTAACAAGCTCACGCAGTTG  
G T F E D H F L S L Q R M F N N C E V V L  
GGCACTTTTGAAGATCATTTTCTCAGCCTCCAGAGGATGTTCAATAACTGTGAGGTGGTCCTT  
G N L E I T Y V Q R N Y D L S F L K T I Q  
GGGAATTTGGAAATTACCTATGTGCAGAGGAATTATGATCTTTCCTTCTTAAAGACCATCCAG  
E V A G Y V L I A L N T V E R I P L E N L  
GAGGTGGCTGGTTATGTCCCTCATTGCCCTCAACACAGTGGAGCGAATTCCTTTGGAAAACCTG  
Q I I R G N M Y Y E N S Y A L A V L S N Y  
CAGATCATCAGAGGAAATATGTACTACGAAAATTCCTATGCCTTAGCAGTCTTATCTAACTAT  
D A N K T G L K E L P M R N L Q E I L H G  
GATGCAAATAAAACCGGACTGAAGGAGCTGCCCATGAGAAATTTACAGGAAATCCTGCATGGC  
A V R F S N N P A L C N V E S I Q W R D I  
GCCGTGCGGTTTCAGCAACAACCTGCCCTGTGCAACGTGGAGAGCATCCAGTGGCGGGACATA  
V S S D F L S N M S M D F Q N H L G S C Q  
GTCAGCAGTGACTTTCTCAGCAACATGTCGATGGACTTCCAGAACCACCTGGGCAGCTGCCAA  
K C D P S C P N G S C W G A G E E N C Q K  
AAGTGTGATCCAAGCTGTCCCAATGGGAGCTGCTGGGGTGCAGGAGAGGAGAACTGCCAGAAA  
L T K I I V D D P G E Q K L I S E E D L N  
CTGACCAAAATCATCGTCGACGATCCGGGGGAACAAAACTCATCTCAGAAGAGGATCTGAAT  
G D P A K A A F D S L Q A S A T E Y I G Y  
GGAATCCCGCAAAGCGGCCTTTGACTCCCTGCAAGCCTCAGCGACCGAATATATCGGTTAT  
A W A M V V V I V G A T I G I K L F K K F  
CGGTGGGCGATGGTTGTTGTCATTGTGCGCGCAACTATCGGTATCAAGCTGTTTTAAGAAATTC  
T S K A S  
ACCTCGAAAGCAAGC

- Sequence 2: HER-1 domain II

M K K I W L A L A G L V L A F S A S A A E  
ATGAAAAAGATTTGGCTGGCGCTGGCTGGTTTAGTTTTAGCGTTTAGCGCAAGTGCACTGAG  
G A A A C A Q Q C S G R C R G K S P S D C  
GGTGGCGCCCTGTGCCAGCAGTGCTCCGGGCGCTGCCGTGGCAAGTCCCCAGTGACTGC  
C H N Q C A A G C T G P R E S D C L V C R  
TGCCACAACCAGTGTGCTGCAGGCTGCACAGGCCCCCGGGAGAGCGACTGCCTGGTCTGCCGC  
K F R D E A T C K D T C P P L M L Y N P T  
AAATTCGAGACGAAGCCACGTGCAAGGACACCTGCCCCCACTCATGCTCTACAACCCACC  
T Y Q M D V N P E G K Y S F G A T C V K K  
ACGTACCAGATGGATGTGAACCCCGAGGGCAAATACAGCTTTGGTGCCACCTGCGTGAAGAAG  
C P R N Y V V T D H G S C V R A C G A D S  
TGTCCCCGTAATTATGTGGTGACAGATCACGGCTCGTGCGTCCGAGCCTGTGGGGCCGACAGC  
Y E M E E D G V R K C K K C E G P C R V D  
TATGAGATGGAGGAAGACGGCGTCCGCAAGTGTAAGAAGTGCGAAGGGCCTTGCCGCCTCGAC  
D P G E Q K L I S E E D L N G D P A K A A  
GATCCGGGGGAACAAAACTCATCTCAGAAGAGGATCTGAATGGAGATCCCGCAAAAGCGGCC  
F D S L Q A S A T E Y I G Y A W A M V V V  
TTTGA CTCCCTGCAAGCCTCAGCGACCGAATATATCGGTTATGCGTGGGCGATGGTTGTTGTC  
I V G A T I G I K L F K K F T S K A S  
ATTGTCGGCGCAACTATCGGTATCAAGCTGTTTAAGAAATTCACCTCGAAAGCAAGC

- Sequence 3: HER-1domain III

M K K I W L A L A G L V L A F S A S A A E  
ATGAAAAAGATTTGGCTGGCGCTGGCTGGTTTAGTTTTAGCGTTTAGCGCAAGTGCACTGAG  
G A A A K V C N G I G I G E F K D S L S I  
GGTGGCGCCGCAAAGTGTGTAACGGAATAGGTATTGGTGAATTTAAAGACTCACTCTCCATA  
N A T N I K H F K N C T S I S G D L H I L  
AATGCTACGAATATTAACACTTCAAAAAGTGCACCTCCATCAGTGGCGATCTCCACATCCTG  
P V A F R G D S F T H T P P L D P Q E L D  
CCGGTGGCATTTAGGGGTGACTCCTTCACACATACTCCTCCTCTGGATCCACAGGAAGTGGAT  
I L K T V K E I T G F L L I Q A W P E N R  
ATTCTGAAAACCGTAAAGGAAATCACAGGGTTTTTGCTGATTCAGGCTTGGCCTGAAAACAGG  
T D L H A F E N L E I I R G R T K Q H G Q  
ACGGACCTCCATGCCTTTGAGAACCTAGAAATCATACGCGGCAGGACCAAGCAACATGGTCAG  
F S L A V V S L N I T S L G L R S L K E I  
TTTTCTCTTGCAGTCGTCAGCCTGAACATAACATCCTTGGGATTACGCTCCCTCAAGGAGATA  
S D G D V I I S G N K N L C Y A N T I N W  
AGTGATGGAGATGTGATAATTTAGGAAACAAAATTTGTGCTATGCAAATACAATAAACTGG  
K K L F G T S G Q K T K I I S N R G E N S  
AAAAAAGTTTGGGACCTCCGGTCAGAAAACAAAATTTATAAGCAACAGAGGTGAAAACAGC  
C K A T G Q V C H A L C S P E G C W G P E  
TGCAAGGCCACAGGCCAGGTCTGCCATGCCTTGTGCTCCCCGAGGGCTGCTGGGGCCCGGAG  
P R D C V S C R N V S R G R E C V D K V D  
CCCAGGGACTGCGTCTCTTGCCGGAATGTCAGCCAGGCAGGGAATGCGTGGACAAGGTCGAC  
D P G E Q K L I S E E D L N G D P A K A A  
GATCCGGGGGAACAAAAGTCACTCAGAAGAGGATCTGAATGGAGATCCCGCAAAGCGGCC  
F D S L Q A S A T E Y I G Y A W A M V V V  
TTTACTCCCTGCAAGCCTCAGCGACCGAATATATCGGTTATGCGTGGCGATGGTTGTTGTC  
I V G A T I G I K L F K K F T S K A S  
ATTGTCGGCGCAACTATCGGTATCAAGCTGTTTAAGAAATTCACCTCGAAAGCAAGC

- Sequence 4: HER-1 domain IV

M K K I W L A L A G L V L A F S A S A A E  
ATGAAAAAGATTTGGCTGGCGCTGGCTGGTTTAGTTTTAGCGTTTAGCGCAAGTGCACTGAG  
G A A A S C R N V S R G R E C V D K C N L  
GGTGGCGCCGCTCTTGCCGGAATGTCAGCCGAGGCAGGGAATGCGTGGACAAGTGCAACCTT  
L E G E P R E F V E N S E C I Q C H P E C  
CTGGAGGGTGAGCCAAGGGAGTTTGTGGAGAACTCTGAGTGCATACAGTGCCACCCAGAGTGC  
L P Q A M N I T C T G R G P D N C I Q C A  
CTGCCTCAGGCCATGAACATCACCTGCACAGGACGGGGACCAGACAACCTGTATCCAGTGTGCC  
H Y I D G P H C V K T C P A G V M G E N N  
CACTACATTGACGGCCCCACTGCGTCAAGACCTGCCCCGGCAGGAGTCATGGGAGAAAACAAC  
T L V W K Y A D A G H V C H L C H P N C T  
ACCCTGGTCTGGAAGTACGCAGACGCCGGCCATGTGTGCCACCTGTGCCATCCAAACTGCACC  
Y G C T G P G L E G C P T N G P K I P S V  
TACGGATGCACTGGGCCAGGTCTTGAAGGCTGTCCAACGAATGGGCCTAAGATCCCGTCCGTC  
D D P G E Q K L I S E E D L N G D P A K A  
GACGATCCGGGGGAACAAAACTCATCTCAGAAGAGGATCTGAATGGAGATCCCGCAAAAGCG  
A F D S L Q A S A T E Y I G Y A W A M V V  
GCCTTTGACTCCCTGCAAGCCTCAGCGACCGAATATATCGGTTATGCGTGGGCGATGGTTGTT  
V I V G A T I G I K L F K K F T S K A S  
GTCATTGTGGCGCAACTATCGGTATCAAGCTGTTTAAAGAAATTCACCTCGAAAGCAAGC

- Sequence 5: HER-2 domain I

M K K I W L A L A G L V L A F S A S A A E  
ATGAAAAAGATTTGGCTGGCGCTGGCTGGTTTAGTTTTAGCGTTTAGCGCAAGTGCA**GCTGAG**  
G A A A T Q V C T G T D M K L R L P A S P  
GGT**GCGGCCCGCC**ACCCAAGTGTGCACCGGCACAGACATGAAGCTGCGGCTCCCTGCCAGTCCC  
E T H L D M L R H L Y Q G C Q V V Q G N L  
GAGACCCACCTGGACATGCTCCGCCACCTCTACCAGGGCTGCCAGGTGGTGCAGGGAAACCTG  
E L T Y L P T N A S L S F L Q D I Q E V Q  
GAACTCACCTACCTGCCACCAATGCCAGCCTGTCTTCCCTGCAGGATATCCAGGAGGTGCAG  
G Y V L I A H N Q V R Q V P L Q R L R I V  
GGCTACGTGCTCATCGCTCACAACCAAGTGAGGCAGGTCCCACTGCAGAGGCTGCGGATTGTG  
R G T Q L F E D N Y A L A V L D N G D P L  
CGAGGCACCCAGCTCTTTGAGGACAACCTATGCCCTGGCCGTGCTAGACAATGGAGACCCGCTG  
N N T T P V T G A S P G G L R E L Q L R S  
AACAAATACCACCCCTGTCACAGGGGCTCCCCAGGAGGCCCTGCGGGAGCTGCAGCTTCGAAGC  
L T E I L K G G V L I Q R N P Q L C Y Q D  
CTCACAGAGATCTTGAAAGGAGGGGTCTTGATCCAGCGGAACCCCCAGCTCTGCTACCAGGAC  
T I L W K D I F H K N N Q L A L T L I D T  
ACGATTTTGTGGAAGGACATCTTCCACAAGAACAACCAGCTGGCTCTCACACTGATAGACACC  
N R S R A C H P C S P M C K G S R C W G E  
AACCGCTCTCGGGCCTGCCACCCCTGTTCTCCGATGTGTAAGGGCTCCCGCTGCTGGGGAGAG  
S S E D C Q S L T R T V V D D P G E Q K L  
AGTTCTGAGGATTGTCAGAGCCTGACGCGCACTGT**GTCGACGAT**CCGGGGGAACAAAAACTC  
I S E E D L N G D P A K A A F D S L Q A S  
ATCTCAGAAGAGGATCTGAATGGAGATCCCGCAAAGCGGCCTTTGACTCCCTGCAAGCCTCA  
A T E Y I G Y A W A M V V V I V G A T I G  
GCGACCGAATATATCGGTTATGCGTGGGCGATGGTTGTTGTCATTGTCGGCGCAACTATCGGT  
I K L F K K F T S K A S  
ATCAAGCTGTTTAAGAAATTCACCTCGAAAGCAAGC



- Sequence 6: HER-2 domain II

M K K I W L A L A G L V L A F S A S A A E  
ATGAAAAAGATTTGGCTGGCGCTGGCTGGTTTAGTTTTAGCGTTTAGCGCAAGTGCA**GCTGAG**  
G A A A C A G G C A R C K G P L P T D C C  
GGT**GCGGCCGC**CTGTGCCGGTGGCTGTGCCCGCTGCAAGGGGCCACTGCCCACTGACTGCTGC  
H E Q C A A G C T G P K H S D C L A C L H  
CATGAGCAGTGTGCTGCCGGCTGCACGGGGCCCAAGCACTCTGACTGCCTGGCCTGCCTCCAC  
F N H S G I C E L H C P A L V T Y N T D T  
TTCAACCACAGTGGCATCTGTGAGCTGCACTGCCAGCCCTGGTCACCTACAACACAGACACG  
F E S M P N P E G R Y T F G A S C V T A C  
TTTGAGTCCATGCCCAATCCCGAGGGCCGGTATACATTCGGCGCCAGCTGTGTGACTGCCTGT  
P Y N Y L S T D V G S C T L V C P L H N Q  
CCCTACAACCTACCTTTCTACGGACGTGGGATCCTGCACCCTCGTCTGCCCCCTGCACAACCAA  
E V T A E D G T Q R C E K C S K P C A R V  
GAGGTGACAGCAGAGGATGGAACACAGCGGTGTGAGAAGTGCAGCAAGCCCTGTGCCCGAGTC  
D D P G E Q K L I S E E D L N G D P A K A  
GACGATCCGGGG**GAACAAAACTCATCTCAGAAGAGGATCTGAATGGA**GATCCCGCAAAGCG  
A F D S L Q A S A T E Y I G Y A W A M V V  
GCCTTTGACTCCCTGCAAGCCTCAGCGACCGAATATATCGGTTATGCGTGGGCGATGGTTGTT  
V I V G A T I G I K L F K K F T S K A S  
GTCATTGTCCGGCGCAACTATCGGTATCAAGCTGTTTTAAGAAATTCACCTCGAAAGCAAGC

- Sequence 7: HER-2 domain III

M K K I W L A L A G L V L A F S A S A A E  
ATGAAAAAGATTTGGCTGGCGCTGGCTGGTTTAGTTTTAGCGTTTAGCGCAAGTGCAGCTGAG  
G A A A C Y G L G M E H L R E V R A V T S  
GGTGCGGCCCGCTGCTATGGTCTGGGCATGGAGCACTTGGCAGAGGTGAGGGCAGTTACCAGT  
A N I Q E F A G C K K I F G S L A F L P E  
GCCAATATCCAGGAGTTTGCTGGCTGCAAGAAGATCTTTGGGAGCCTGGCATTCTGCCGGAG  
S F D G D P A S N T A P L Q P E Q L Q V F  
AGCTTTGATGGGGACCCAGCCTCCAACACTGCCCCGCTCCAGCCAGAGCAGCTCCAAGTGTTT  
E T L E E I T G Y L Y I S A W P D S L P D  
GAGACTCTGGAAGAGATCACAGGTTACCTATACATCTCAGCATGGCCGGACAGCCTGCCTGAC  
L S V F Q N L Q V I R G R I L H N G A Y S  
CTCAGCGTCTTCCAGAACCTGCAAGTAATCCGGGGACGAATTCTGCACAATGGCGCCTACTCG  
L T L Q G L G I S W L G L R S L R E L G S  
CTGACCCTGCAAGGGCTGGGCATCAGCTGGCTGGGGCTGCGCTCACTGAGGGAAGTGGGCAGT  
G L A L I H H N T H L C F V H T V P W D Q  
GGACTGGCCCTCATCCACCATAACACCCACCTCTGCTTCGTGCACACGGTGCCTGGGACCAG  
L F R N P H Q A L L H T A N R P E D E C V  
CTCTTTTCGGAACCCGCACCAAGCTCTGCTCCACACTGCCAACCGGCCAGAGGACGAGTGTGTG  
G E G L A C H Q L C A R G H C W G P G P T  
GGCGAGGGCCTGGCCTGCCACCAGCTGTGCGCCCGAGGGCACTGCTGGGGTCCAGGGCCCACC  
Q C V N C S Q F L R G Q E C V E E V D D P  
CAGTGTGTCAACTGCAGCCAGTTCCTTCGGGGCCAGGAGTGCCTGGAGGAAGTCGACGATCCG  
G E Q K L I S E E D L N G D P A K A A F D  
GGGGAACAAAACCTCATCTCAGAAGAGGATCTGAATGGAGATCCCGCAAAGCGGCCTTTGAC  
S L Q A S A T E Y I G Y A W A M V V V I V  
TCCCTGCAAGCCTCAGCGACCGAATATATCGGTTATGCGTGGGCGATGGTTGTTGTCATTGTC  
G A T I G I K L F K K F T S K A S  
GGCGCAACTATCGGTATCAAGCTGTTTAAGAAATTCACCTCGAAAGCAAGC

- Sequence 8: HER-2 domain IV

M K K I W L A L A G L V L A F S A S A A E  
ATGAAAAAGATTTGGCTGGCGCTGGCTGGTTTAGTTTTAGCGTTTAGCGCAAGTGCAGCTGAG  
G A A A C S Q F L R G Q E C V E E C R V L  
GGTGGCGCCGCTGCAGCCAGTTCCTTCGGGGCCAGGAGTGCCTGGAGGAATGCCGAGTACTG  
Q G L P R E Y V N A R H C L P C H P E C Q  
CAGGGGCTCCCCAGGGAGTATGTGAATGCCAGGCACTGTTTGCCGTGCCACCCTGAGTGTGAG  
P Q N G S V T C F G P E A D Q C V A C A H  
CCCCAGAATGGCTCAGTGACCTGTTTTGGACCGGAGGCTGACCAGTGTGTGGCCTGTGCCAC  
Y K D P P F C V A R C P S G V K P D L S Y  
TATAAGGACCCCTCCCTTCTGCGTGGCCCGCTGCCCCAGCGGTGTGAAACCTGACCTCTCCTAC  
M P I W K F P D E E G A C Q P C P I N C T  
ATGCCCATCTGGAAGTTTCCAGATGAGGAGGGCGCATGCCAGCCTTGCCCCATCAACTGCACC  
H S C V D L D D K G C P A E V D D P G E Q  
CACTCCTGTGTGGACCTGGATGACAAGGGCTGCCCCGCCGAGGTCGACGATCCGGGGGAACAA  
K L I S E E D L N G D P A K A A F D S L Q  
AAACTCATCTCAGAAGAGGATCTGAATGGAGATCCCGCAAAGCGGCCTTTGACTCCCTGCAA  
A S A T E Y I G Y A W A M V V V I V G A T  
GCCTCAGCGACCGAATATATCGGTTATGCGTGGGCGATGGTTGTTGTCATTGTGGCGCAACT  
I G I K L F K K F T S K A S  
ATCGGTATCAAGCTGTTTAAGAAATTCACCTCGAAAGCAAGC

- Sequence 9: HER-1 domain III **S440L**

**M K K I W L A L A G L V L A F S A S A A E**  
**ATGAAAAAGATTTGGCTGGCGCTGGCTGGTTTAGTTTTAGCGTTTAGCGCAAGTGCAGCTGAG**  
**G A A A K V C N G I G I G E F K D S L S I**  
**GGTGGCGCGCCAAAGTGTGTAACGGAATAGGTATTGGTGAATTTAAAGACTCACTCTCCATA**  
**N A T N I K H F K N C T S I S G D L H I L**  
**AATGCTACGAATATTAACACTTCAAAAACCTGCACCTCCATCAGTGGCGATCTCCACATCCTG**  
**P V A F R G D S F T H T P P L D P Q E L D**  
**CCGGTGGCATTTAGGGGTGACTCCTTACACATACTCCTCCTCTGGATCCACAGGAACCTGGAT**  
**I L K T V K E I T G F L L I Q A W P E N R**  
**ATTCTGAAAACCGTAAAGGAAATCACAGGGTTTTTGTCTGATTCAGGCTTGGCCTGAAAACAGG**  
**T D L H A F E N L E I I R G R T K Q H G Q**  
**ACGGACCTCCATGCCTTTGAGAACCTAGAAATCATACGCGGCAGGACCAAGCAACATGGTCAG**  
**F S L A V V S L N I T S L G L R S L K E I**  
**TTTTCTCTTGCAGTCGTCAGCCTGAACATAACATCCTTGGGATTACGCTCCCTCAAGGAGATA**  
**S D G D V I I L G N K N L C Y A N T I N W**  
**AGTGATGGAGATGTGATAATTCTGGGAAACAAAATTTGTGCTATGCAAATACAATAAACTGG**  
**K K L F G T S G Q K T K I I S N R G E N S**  
**AAAAAACTGTTTGGGACCTCCGGTCAGAAAACCAAATTTATAAGCAACAGAGGTGAAAACAGC**  
**C K A T G Q V C H A L C S P E G C W G P E**  
**TGCAAGGCCACAGGCCAGGTCTGCCATGCCTTGTGCTCCCCGAGGGCTGCTGGGGCCCGGAG**  
**P R D C V S C R N V S R G R E C V D K V D**  
**CCCAGGGACTGCGTCTCTTGCCGGAATGTCAGCCGAGGCAGGGAATGCGTGGACAAGGTCGAC**  
**D P G E Q K L I S E E D L N G D P A K A A**  
**GATCCGGGGGAACAAAAACTCATCTCAGAAGAGGATCTGAATGGA****GATCCCGCAAAAGCGGCC**  
**F D S L Q A S A T E Y I G Y A W A M V V V**  
**TTTGACTCCCTGCAAGCCTCAGCGACCGAATATATCGGTTATGCGTGGGCGATGGTTGTTGTC**  
**I V G A T I G I K L F K K F T S K A S**  
**ATTGTCGGCGCAACTATCGGTATCAAGCTGTTTAAGAAATTCACCTCGAAAGCAAGC**

- Sequence 10: HER-1 domain III **G441R**

**M K K I W L A L A G L V L A F S A S A A E**  
**ATGAAAAAGATTTGGCTGGCGCTGGCTGGTTTAGTTTTAGCGTTTAGCGCAAGTGCA****GCTGAG**  
**G A A A K V C N G I G I G E F K D S L S I**  
**GGTGGCGCCG****CAAAGTGTGTAACGGAATAGGTATTGGTGAATTTAAAGACTCACTCTCCATA**  
**N A T N I K H F K N C T S I S G D L H I L**  
**AATGCTACGAATATTAACACTTCAAAAAGTGCACCTCCATCAGTGGCGATCTCCACATCCTG**  
**P V A F R G D S F T H T P P L D P Q E L D**  
**CCGGTGGCATTTAGGGGTGACTCCTTCACACATACTCCTCCTCTGGATCCACAGGAAGTGGAT**  
**I L K T V K E I T G F L L I Q A W P E N R**  
**ATTCTGAAAACCGTAAAGGAAATCACAGGGTTTTTGCTGATTCAGGCTTGGCCTGAAAACAGG**  
**T D L H A F E N L E I I R G R T K Q H G Q**  
**ACGGACCTCCATGCCTTTGAGAACCTAGAAATCATACGCGGCAGGACCAAGCAACATGGTCAG**  
**F S L A V V S L N I T S L G L R S L K E I**  
**TTTTCTCTTGCAAGTCGTCAGCCTGAACATAACATCCTTGGGATTACGCTCCCTCAAGGAGATA**  
**S D G D V I I S R N K N L C Y A N T I N W**  
**AGTGATGGAGATGTGATAATTTCACGTAACAAAATTTGTGCTATGCAAATACAATAAACTGG**  
**K K L F G T S G Q K T K I I S N R G E N S**  
**AAAAAAGTTTGGGACCTCCGGTCAGAAAACCAAATTTATAAGCAACAGAGGTGAAAACAGC**  
**C K A T G Q V C H A L C S P E G C W G P E**  
**TGCAAGGCCACAGGCCAGGTCTGCCATGCCTTGTGCTCCCCGAGGGCTGCTGGGGCCCGGAG**  
**P R D C V S C R N V S R G R E C V D K V D**  
**CCCAGGGACTGCGTCTCTTGCCGGAATGTCAGCCGAGGCAGGGAATGCGTGGACAAG****GTCGAC**  
**D P G E Q K L I S E E D L N G D P A K A A**  
**GATCCGGGG****GAACAAAAGTCACTCTCAGAAGAGGATCTGAATGGAGATCCCGCAAAGCGGCC**  
**F D S L Q A S A T E Y I G Y A W A M V V V**  
**TTTACTCCCTGCAAGCCTCAGCGACCGAATATATCGGTTATGCGTGGCGGATGGTTGTTGTC**  
**I V G A T I G I K L F K K F T S K A S**  
**ATTGTCGGCGCAACTATCGGTATCAAGCTGTTTAAGAAATTCACCTCGAAAGCAAGC**

- Sequence 11: HER-1 domain III **K443A**

M K K I W L A L A G L V L A F S A S A A E  
ATGAAAAAGATTTGGCTGGCGCTGGCTGGTTTAGTTTTAGCGTTTAGCGCAAGTGCA**GCTGAG**  
G A A A K V C N G I G I G E F K D S L S I  
GGT**GCGGCC**AAAGTGTGTAACGGAATAGGTATTGGTGAATTTAAAGACTCACTCTCCATA  
N A T N I K H F K N C T S I S G D L H I L  
AATGCTACGAATATTAACACTTCAAAA**ACTGCACCTCCATCAGTGGCGATCTCCACATCCTG**  
P V A F R G D S F T H T P P L D P Q E L D  
CCGGTGGCATTTAGGGGTGACTCCTT**CACACATACTCCTCCTCTGGATCCACAGGA**ACTGGAT****  
I L K T V K E I T G F L L I Q A W P E N R  
ATTCTGAAAACCGTAAAGGAAATCACAGGGTTTTTGCTGATTCAGGCTTGGCCTGAAAACAGG  
T D L H A F E N L E I I R G R T K Q H G Q  
ACGGACCTCCATGCCTTTGAGAACCTAGAAATC**ATACGCGGCAGGACCAAGCAACATGGTCAG**  
F S L A V V S L N I T S L G L R S L K E I  
TTTTCTCTTG**CAGTCGTCAGCCTGAACATAACATCCTTGGGATTACGCTCCCTCAAGGAGATA**  
S D G D V I I S G N A N L C Y A N T I N W  
AGTGATGGAGATGTGATAATTT**CAGGAAACCGGAATTTGTGCTATGCAAATACAATA**AACTGG****  
K K L F G T S G Q K T K I I S N R G E N S  
AAAA**AACTGTTTGGGACCTCCGGTCAGAAAACCAAAT**TATAAGCAACAGAGGTGAAAACAGC  
C K A T G Q V C H A L C S P E G C W G P E  
TGCAAGGCCACAGGCCAGGTCTGCCATGCCTTGTGCTCCCCGAGGGCTGCTGGGGCCCGGAG  
P R D C V S C R N V S R G R E C V D K V D  
CCCAGGGACTGCGTCTCTTGCCGGAATGTCAGCCAGGCAGGGAATGCGTGGACAAG**GTCGAC**  
D P G E Q K L I S E E D L N G D P A K A A  
GATCCGGGG**GAACAAAAACTCATCTCAGAAGAGGATCTGAATGGAGATCCCGCAAAGCGGCC**  
F D S L Q A S A T E Y I G Y A W A M V V V  
TTT**GA**CTCCCTGCAAGCCTCAGCGACCGAATATATCGGTTATGCGTGGCGGATGGTTGTTGTC  
I V G A T I G I K L F K K F T S K A S  
ATTGTCGGCGCAACTATCGGTATCAAGCTGTTTAAGAAATTCACCTCGAAAGCAAGC

- Sequence 12: HER-1 domain III **K443T**

M K K I W L A L A G L V L A F S A S A A E  
ATGAAAAAGATTTGGCTGGCGCTGGCTGGTTTAGTTTTAGCGTTTAGCGCAAGTGCA**GCTGAG**  
G A A A K V C N G I G I G E F K D S L S I  
GGT**GCGGCC**AAAGTGTGTAACGGAATAGGTATTGGTGAATTTAAAGACTCACTCTCCATA  
N A T N I K H F K N C T S I S G D L H I L  
AATGCTACGAATATTAACACTTCAAAA**ACTGCACCTCCATCAGTGGCGATCTCCACATCCTG**  
P V A F R G D S F T H T P P L D P Q E L D  
CCGGTGGCATTTAGGGGTGACTCCTT**CACACATACTCCTCCTCTGGATCCACAGGA**ACTGGAT****  
I L K T V K E I T G F L L I Q A W P E N R  
ATTCTGAAAACCGTAAAGGAAATCACAGGGTTTTTGCTGATTCAGGCTTGGCCTGAAAACAGG  
T D L H A F E N L E I I R G R T K Q H G Q  
ACGGACCTCCATGCCTTTGAGAACCTAGAAATC**ATACGCGGCAGGACCAAGCAACATGGTCAG**  
F S L A V V S L N I T S L G L R S L K E I  
TTTTCTCTTG**CAGTCGTCAGCCTGAACATAACATCCTTGGGATTACGCTCCCTCAAGGAGATA**  
S D G D V I I S G N T N L C Y A N T I N W  
AGTGATGGAGATGTGATAATTT**CAGGAAACACCA**ATTTGTGCTATGCAAATACAATA**AACTGG**  
K K L F G T S G Q K T K I I S N R G E N S  
AAAA**AACTGTTTGGGACCTCCGGTCAGAAAACCAA**AATTATAAGCAACAGAGGTGAAAACAGC  
C K A T G Q V C H A L C S P E G C W G P E  
TGCAAGGCCACAGGCCAGGTCTGCCATGCCTTGTGCTCCCCGAGGGCTGCTGGGGCCCGGAG  
P R D C V S C R N V S R G R E C V D K V D  
CCCAGGGACTGCGTCTCTTGCCGGAATGTCAGCCAGGCAGGGAATGCGTGGACAAG**GTCGAC**  
D P G E Q K L I S E E D L N G D P A K A A  
GATCCGGGG**GAACAAAAACTCATCTCAGAAGAGGATCTGAATGGAGATCCCGCAA**AGCGGCC  
F D S L Q A S A T E Y I G Y A W A M V V V  
TTT**ACTCCCTGCAAGCCTCAGCGACCGAATATATCGGTTATGCGTGGCGGATGGTTGTTGTC**  
I V G A T I G I K L F K K F T S K A S  
ATTGTCGGCGCAACTATCGGTATCAAGCTGTTTAAGAAATTCACCTCGAAAGCAAGC

- Sequence 13: HER-1 domain III **I467M**

**M K K I W L A L A G L V L A F S A S A A E**  
**ATGAAAAAGATTTGGCTGGCGCTGGCTGGTTTAGTTTTAGCGTTTAGCGCAAGTGCAGCTGAG**  
**G A A A K V C N G I G I G E F K D S L S I**  
**GGTGGCGCGCCAAAGTGTGTAACGGAATAGGTATTGGTGAATTTAAAGACTCACTCTCCATA**  
**N A T N I K H F K N C T S I S G D L H I L**  
**AATGCTACGAATATTAACACTTCAAAAACCTGCACCTCCATCAGTGGCGATCTCCACATCCTG**  
**P V A F R G D S F T H T P P L D P Q E L D**  
**CCGGTGGCATTTAGGGGTGACTCCTTACACATACTCCTCCTCTGGATCCACAGGAACCTGGAT**  
**I L K T V K E I T G F L L I Q A W P E N R**  
**ATTCTGAAAACCGTAAAGGAAATCACAGGGTTTTTGGCTGATTCAGGCTTGGCCTGAAAACAGG**  
**T D L H A F E N L E I I R G R T K Q H G Q**  
**ACGGACCTCCATGCCTTTGAGAACCTAGAAATCATACGCGGCAGGACCAAGCAACATGGTCAG**  
**F S L A V V S L N I T S L G L R S L K E I**  
**TTTTCTCTTGCAGTCGTCAGCCTGAACATAACATCCTTGGGATTACGCTCCCTCAAGGAGATA**  
**S D G D V I I S G N A N L C Y A N T I N W**  
**AGTGATGGAGATGTGATAATTTAGGAAACGCGAATTTGTGCTATGCAAATACAATAAACTGG**  
**K K L F G T S G Q K T K I M S N R G E N S**  
**AAAAAACTGTTTGGGACCTCCGGTCAGAAAACCAAATTTATGAGCAACAGAGGTGAAAACAGC**  
**C K A T G Q V C H A L C S P E G C W G P E**  
**TGCAAGGCCACAGGCCAGGTCTGCCATGCCTTGTGCTCCCCGAGGGCTGCTGGGGCCCGGAG**  
**P R D C V S C R N V S R G R E C V D K V D**  
**CCCAGGGACTGCGTCTCTTGCCGGAATGTCAGCCGAGGCAGGGAATGCGTGGACAAGGTCGAC**  
**D P G E Q K L I S E E D L N G D P A K A A**  
**GATCCGGGGGAACAAAAACTCATCTCAGAAGAGGATCTGAATGGAGATCCCGCAAAAGCGGCC**  
**F D S L Q A S A T E Y I G Y A W A M V V V**  
**TTTGACTCCCTGCAAGCCTCAGCGACCGAATATATCGGTTATGCGTGGGCGATGGTTGTTGTC**  
**I V G A T I G I K L F K K F T S K A S**  
**ATTGTCGGCGCAACTATCGGTATCAAGCTGTTTAAGAAATTCACCTCGAAAGCAAGC**



- Sequence 14: HER-1 domain III **S468R**

M K K I W L A L A G L V L A F S A S A A E  
ATGAAAAAGATTTGGCTGGCGCTGGCTGGTTTAGTTTTAGCGTTTAGCGCAAGTGCA**GCTGAG**  
G A A A K V C N G I G I G E F K D S L S I  
GGT**GCGGCC**CAAAGTGTGTAACGGAATAGGTATTGGTGAATTTAAAGACTCACTCTCCATA  
N A T N I K H F K N C T S I S G D L H I L  
AATGCTACGAATATTAACACTTCAAAA**ACTGCACCTCCATCAGTGGCGATCTCCACATCCTG**  
P V A F R G D S F T H T P P L D P Q E L D  
CCGGTGGCATTTAGGGGTGACTCCTT**CACACATACTCCTCCTCTGGATCCACAGGA**ACTGGAT****  
I L K T V K E I T G F L L I Q A W P E N R  
ATTCTGAAAACCGTAAAGGAAATCACAGGGTTTTTGCTGATTCAGGCTTGGCCTGAAAACAGG  
T D L H A F E N L E I I R G R T K Q H G Q  
ACGGACCTCCATGCCTTTGAGAACCTAGAAATC**ATACGCGGCAGGACCAAGCAACATGGTCAG**  
F S L A V V S L N I T S L G L R S L K E I  
TTTTCTCTTGCAGTCGTCAGCCTGAACATAACATCCTTGGGATTACGCTCCCTCAAGGAGATA  
S D G D V I I S G N A N L C Y A N T I N W  
AGTGATGGAGATGTGATAATTT**CAGGAAACGCGAATTTGTGCTATGCAAATACAATAAACTGG**  
K K L F G T S G Q K T K I I R N R G E N S  
AAAA**ACTGTTTGGGACCTCCGGTCAGAAAACCAAAT**TATACGTAACAGAGGTGAAAACAGC  
C K A T G Q V C H A L C S P E G C W G P E  
TGCAAGGCCACAGGCCAGGTCTGCCATGCCTTGTGCTCCCCGAGGGCTGCTGGGGCCCGGAG  
P R D C V S C R N V S R G R E C V D K V D  
CCCAGGGACTGCGTCTCTT**GCCGGAATGTCAGCCAGGCAGGGAATGCGTGGACAAGGTCGAC**  
D P G E Q K L I S E E D L N G D P A K A A  
GATCCGGGG**GAACAAAAACTCATCTCAGAAGAGGATCTGAATGGAGATCCCGCAAAGCGGCC**  
F D S L Q A S A T E Y I G Y A W A M V V V  
TTT**ACTCCCTGCAAGCCTCAGCGACCGAATATATCGGTTATGCGTGGCGATGGTTGTTGTC**  
I V G A T I G I K L F K K F T S K A S  
ATTGTCGGCGCAACTATCGGTATCAAGCTGTTTAAGAAATTCACCTCGAAAGCAAGC

- Sequence 15: HER-2 domain IV **D560A**

M K K I W L A L A G L V L A F S A S A A E  
ATGAAAAAGATTTGGCTGGCGCTGGCTGGTTTAGTTTTAGCGTTTAGCGCAAGTGCAGCTGAG  
G A A A C S Q F L R G Q E C V E E C R V L  
GGTGGCGCCGCTGCAGCCAGTTCCTTCGGGGCCAGGAGTGCCTGGAGGAATGCCGAGTACTG  
Q G L P R E Y V N A R H C L P C H P E C Q  
CAGGGGCTCCCCAGGGAGTATGTGAATGCCAGGCACTGTTTGCCGTGCCACCCTGAGTGTGAG  
P Q N G S V T C F G P E A A Q C V A C A H  
CCCCAGAATGGCTCAGTGACCTGTTTTGGACCGGAGGCTGCGCAGTGTGTGGCCTGTGCCAC  
Y K D P P F C V A R C P S G V K P D L S Y  
TATAAGGACCCCTCCCTTCTGCGTGGCCCGCTGCCCCAGCGGTGTGAAACCTGACCTCTCCTAC  
M P I W K F P D E E G A C Q P C P I N C T  
ATGCCCATCTGGAAGTTTCCAGATGAGGAGGGCGCATGCCAGCCTTGCCCCATCAACTGCACC  
H S C V D L D D K G C P A E V D D P G E Q  
CACTCCTGTGTGGACCTGGATGACAAGGGCTGCCCCGCCGAGGTCGACGATCCGGGGGAACAA  
K L I S E E D L N G D P A K A A F D S L Q  
AAACTCATCTCAGAAGAGGATCTGAATGGAGATCCCGCAAAGCGGCCTTTGACTCCCTGCAA  
A S A T E Y I G Y A W A M V V V I V G A T  
GCCTCAGCGACCGAATATATCGGTTATGCGTGGGCGATGGTTGTTGTCATTGTGGCGCAACT  
I G I K L F K K F T S K A S  
ATCGGTATCAAGCTGTTTAAAGAAATTCACCTCGAAAGCAAGC

- Sequence 16: HER-2 domain IV **D560N**

M K K I W L A L A G L V L A F S A S A A E  
ATGAAAAAGATTTGGCTGGCGCTGGCTGGTTTAGTTTTAGCGTTTAGCGCAAGTGCAGCTGAG  
G A A A C S Q F L R G Q E C V E E C R V L  
GGTGGCGCCGCTGCAGCCAGTTCCTTCGGGGCCAGGAGTGCCTGGAGGAATGCCGAGTACTG  
Q G L P R E Y V N A R H C L P C H P E C Q  
CAGGGGCTCCCCAGGGAGTATGTGAATGCCAGGCACTGTTTGCCGTGCCACCCTGAGTGTGAG  
P Q N G S V T C F G P E A N Q C V A C A H  
CCCCAGAATGGCTCAGTGACCTGTTTTGGACCGGAGGCTAACCAGTGTGTGGCCTGTGCCAC  
Y K D P P F C V A R C P S G V K P D L S Y  
TATAAGGACCCCTCCCTTCTGCGTGGCCCGCTGCCCCAGCGGTGTGAAACCTGACCTCTCCTAC  
M P I W K F P D E E G A C Q P C P I N C T  
ATGCCCATCTGGAAGTTTCCAGATGAGGAGGGCGCATGCCAGCCTTGCCCCATCAACTGCACC  
H S C V D L D D K G C P A E V D D P G E Q  
CACTCCTGTGTGGACCTGGATGACAAGGGCTGCCCCGCCGAGGTCGACGATCCGGGGGAACAA  
K L I S E E D L N G D P A K A A F D S L Q  
AAACTCATCTCAGAAGAGGATCTGAATGGAGATCCCGCAAAGCGGCCTTTGACTCCCTGCAA  
A S A T E Y I G Y A W A M V V V I V G A T  
GCCTCAGCGACCGAATATATCGGTTATGCGTGGGCGATGGTTGTTGTCATTGTGGCGCAACT  
I G I K L F K K F T S K A S  
ATCGGTATCAAGCTGTTTAAAGAAATTCACCTCGAAAGCAAGC
